## RESEARCH ARTICLE

# Oxidative stress, photodamage and the role of screening pigments in insect eyes

Teresita C. Insausti, Marion Le Gall and Claudio R. Lazzari\*

Institut de Recherche sur la Biologie de l'Insecte, UMR 7261 CNRS – Université François Rabelais, Tours, France

\*Author for correspondence (claudio.lazzari@univ-tours.fr)

### SUMMARY

Using red-eyed mutant triatomine bugs (Hemiptera: Reduviidae), we tested the hypothesis of an alternative function of insect screening pigments against oxidative stress. To test our hypothesis, we studied the morphological and physiological changes associated with the mutation. We found that wild-type eyes possess a great amount of brown and red screening pigment inside the primary and secondary pigment cells as well as in the reticular cells. Red-eyed mutants, however, have only scarce red granules inside the pigmentary cells. We then compared the visual sensitivity of red-eyed mutants and wild types by measuring the photonegative responses of insects reared in light:dark cycles [12 h:12 h light:dark (LD)] or constant darkness (DD). Finally, we analyzed both the impact of oxidative stress associated with blood ingestion and photodamage of UV light on the eye retina. We found that red-eyed mutants reared in DD conditions were the most sensitive to the light intensities tested. Retinae of LD-reared mutants were gradually damaged over the life cycle, while for DD-reared insects retinae were conserved intact. No retinal damage was observed in non-fed mutants exposed to UV light for 2 weeks, whereas insects fed on blood prior to UV exposure showed clear signs of retinal damage. Wild-type insects exposed to UV light showed a marked increase in the amount and density of screening pigments.

Key words: compound eyes, ocelli, ommochromes, hematophagy, mutants.

Received 12 November 2012; Accepted 30 April 2013

### INTRODUCTION

Mutations in eye color have been identified in several insect species and have been used as a marker in genetic studies or to follow different experimental populations. For instance, differences in eye color have been used to quantify the reproductive success of competing individuals by comparing the proportion of mutants to wild type in the offspring (Pires et al., 2002).

Mutants are also used as model systems for studies on the functional organization of visual systems. Indeed, eye color is given by screening pigments inside animal eyes, and, although in some species they may play a role in camouflage or in the protection against UV light photodamage, these pigments are mostly related to the visual function (Stavenga, 1989). Therefore, any modification of their nature or distribution, particularly their absence, may have important consequences on visual performance. In vertebrates and crustaceans it has been suggested that screening pigments could also protect cells from the photo-oxidative damage derived from lipid peroxidation (Sakina et al., 1987; Ostrovsky et al., 1987; Dontsov et al., 1984; Dontsov et al., 1999). However, such a function has never been tested in the compound eyes of insects.

For different species, mutations can differently affect parts of the screening pigment synthesis pathway and consequences for visual sensitivity might differ. Despite the frequent use of eye color mutants in experiments, the morphological, physiological and behavioral consequences of such mutations remain unknown for most insects. The physiological and behavioral consequences of eye-color mutations have been studied in flies and honeybees, and alterations in visual sensitivity were described (e.g. Hotta and Benzer, 1969; Gribakin and Chesnokova, 1982). Among hemimetabolous insects, such mutations have been reported in several species of triatomine bugs (Hemiptera:

Reduviidae), red-eyed mutants being the most frequent. Red-eyed mutant bugs are a particularly interesting model system for studying the visual function for multiple reasons. First, these bugs are highly sensitive to light because of their nocturnal habits (Reisenman et al., 1998). Triatomines have a particular visual system, i.e. organization of compound eyes and complexity of the ocellar system (Reisenman et al., 2002; Insausti and Lazzari, 2002). Additionally, they are hemimetabolous insects, making it possible to experiment on all stages throughout life (6 to 12 months). Finally, they are obligatory hematophagous throughout their entire life, which exposes them to the oxidative stress derived from the heme group of the ingested blood (Vincent, 1989; Graça-Souza et al., 2006).

The goal of this study is to shed some light onto the role of screening pigments present in insect eyes. Using two species of triatomine bugs, we investigated: (1) the morphological changes in the compound eyes and ocelli, associated with the red-eye mutation; (2) the visual sensitivity of mutants in comparison with wild-type insects; (3) the effect of light and blood ingestion on retinal cells; and (4) the role of screening pigments.

### MATERIALS AND METHODS

#### Experimental animals

Larvae and adults of red-eyed mutants and wild-type *Triatoma infestans* Klug 1834 and *Rhodnius prolixus* Stål 1859 were used throughout their life cycle. The insects were reared in a laboratory colony at 26°C and fed weekly on heparin-treated sheep blood, through an artificial feeder (Núñez and Lazzari, 1990).

Because the response to light, structure of compound eyes and ocelli, as well as pigment migration have been well characterized in *T. infestans* (Reisenman et al., 1998; Reisenman et al., 2002;

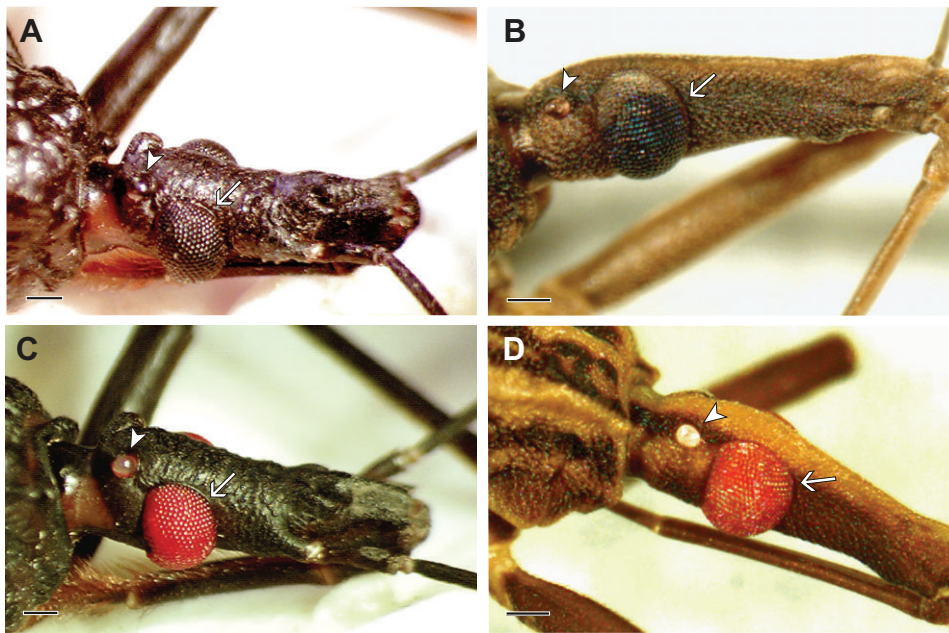

Fig. 1. Head of *Triatoma infestans* (A,B) and *Rhodnius prolixus* (C,D) in lateral view. (A,C) Wild type. (B,D) Red-eyed mutant. The right ocellus (arrowhead) and compound eye (arrow) are shown. Scale bars, 300  $\mu$ m.

Insausti and Lazzari, 2002; Lazzari et al., 1998; Lazzari et al., 2011), this species was chosen to study the modification of eye structure associated with the red-eyed mutation, the visual sensitivity of mutants and the impact of light exposure on the retina and visual performance.

*Rhodnius prolixus* is a classical model for the study of oxidative stress associated with blood ingestion (Graça-Souza et al., 2006; Caiaffa et al., 2010; Stiebler et al., 2010). For this reason, we used this species to analyze the response of mutants and wild-type bugs to the exposure of photo and heme oxidative stress.

The wild-type insects were maintained under a 12h:12h light:dark photoperiod (LD; 140 mW cm<sup>-2</sup>) for their entire life. Red-eyed mutants were maintained for their entire life (i.e. from eggs) either in permanent darkness (DD) or under an LD cycle.

#### Eye morphology

Larvae and adults of *T. infestans* and *R. prolixus* were analyzed. Light microscopy was performed on the insect heads following the procedure described previously (Reisenman et al., 2002). In brief, the posterior half of the head (containing the compound eyes and the ocelli) was fixed for 3 h in a mixture of 2.5% glutaraldehyde and 2.0% paraformaldehyde in phosphate buffer (pH 7.3) with glucose and CaCl<sub>2</sub> added. After dehydration, they were embedded *via* propylene oxide in Durcupan ACM (Electron Microscopy Sciences

no. 14040, Hatfield, PA, USA). Blocks were serially sectioned at 5  $\mu$ m using glass knives mounted on a microtome. The sections were stained on a hot plate with 1% Methylene Blue and mounted on a slide with DPX (Electron Microscopy Sciences no. 13510).

#### Visual sensitivity

As an experimental paradigm for behavioral tests, we measured the photonegative response of both groups of mutants and of wild-type *T. infestans* (Reisenman et al., 1998).

The phototactic behavior of bugs was measured in a rectangular arena as described in Lazzari et al. (Lazzari et al., 1998). The arena (25×5.5×2.2 cm length × width × height) had filter paper for substrate and was covered with a rectangular piece of glass. Half of the arena was kept in the dark by means of black cardboard fixed to the glass cover, and the other half remained uncovered. The uncovered half was illuminated with a halogen light (=white light source) (OSRAM 41860 WF, 12 V/20 W, Danvers, MA, USA) located in an aluminum cylinder (diameter: 8 cm, height: 17 cm) that rested on top of a diffusing glass, 60 cm above the arena. The lamp was located above the right or left end of the arena in order to accentuate differences between dark and illuminated halves.

Neutral density filters (Melles Griot fused silica filters, Albuquerque, NM, USA) were interposed between the lamp and the arena to obtain a light intensity on the illuminated side of the

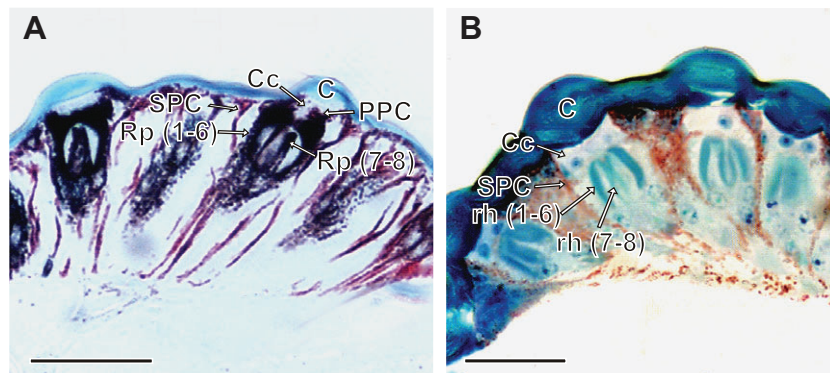

Fig. 2. Light micrographs of longitudinal sections through the compound eyes of the recently hatched first larval stage of (A) wild-type and (B) red-eyed mutant *Triatoma infestans*. C, cornea; Cc, crystalline cone; PPC, primary pigment cell; rh, rhabdomere; Rp, retinal pigment; SPC, secondary pigment cell; 1–8 indicate the retinula cell number. Scale bars, 50  $\mu$ m.



arena of either  $0.6$  or  $6 \mu\text{W cm}^{-2}$ . Light intensity was measured with a radiometer (SEL 033 sensor module, IL 1400 radiometer; International Light, Newburyport, MA, USA, provided with a photometric filter).

All of the experiments were performed at  $25^\circ\text{C}$ , and each bug was used in only one trial. Spatial asymmetries were avoided by interchanging areas between trials.

For each trial, a single bug was released. The insect was first placed within a small dark bowl in the dark end of the area. After 40 s of rest, the bowl was carefully inverted and the trial started. Each trial lasted 5 min. The behavioral variable quantified was permanence time in darkness (%), i.e. total time (s) spent in the dark half of the arena, expressed as percentage of the total time of the trial. Controls were tested in total darkness and permanence time was computed considering the side in which the insect was released (right or left). Experiments in total darkness were monitored with the aid of a night vision system provided with an infrared illumination source (900 nm), which the bugs cannot see (Reisenman et al., 1998).

Twenty wild-type or mutant individuals were tested by group. A two-way ANOVA was performed (normality and homocedasticity tests passed) in order to test the effect of light intensity and experimental group on permanence time in darkness.

#### The effect of blood ingestion and UV exposure

To analyze whether both types of oxidative pressure, i.e. light and heme, could have interactive effects, we compared the eyes of fed and unfed wild-type and mutant bugs exposed to UV light. This light was chosen because it imposed a stronger photo-oxidative stress than white light (Meyer-Rochow, 1994; Meyer-Rochow et al., 2002). Groups of fifth-instar larvae of *R. prolixus* were exposed to  $31 \mu\text{W cm}^{-2}$  UV light (Hanau Fluotest Type 5301, Hanau, Germany) or kept in darkness for 2 or 4 weeks. The intensity of UV light was chosen to be within the visual sensitivity of bugs, which ranges from  $0.05$  to  $115 \mu\text{W cm}^{-2}$  (Reisenman et al., 1998).

The analysis of the structure and condition of the eyes was conducted by means of histological preparations and light microscopy as described in the 'Eye morphology' section above.

## RESULTS

### Eye morphology

On gross external inspection, the eye color of wild individuals of both species analyzed is dark brown, whereas the eyes of mutant insects are bright red (Fig. 1). Compound eyes of wild individuals *T. infestans* and *R. prolixus* have been described by Reisenman et al. (Reisenman et al., 2002) and by Müller (Müller, 1970), respectively. These bugs possess apposition compound eyes with open rhabdoms, in which a ring of six rhabdomeres (rh 1–6) from retinula cells 1–6 surrounds a central pair of rhabdomeres (rh 7–8) from retinula cells 7 and 8. The crystalline cone is surrounded by two primary pigment cells. Twenty-four secondary pigment cells enclose each ommatidium. Dark granules of screening pigments are located not only in the pigment cells, but also inside all retinula cells. The rhabdomeres and most of the screening pigments are restricted to the distal half of the retinula cells; the proximal half is occupied by the nucleus, some pigments and clear globular structures, termed 'sphaeroids' (Fig. 2A, Fig. 3A, Fig. 4A,B, Fig. 7A,C). In the ocelli, large amounts of pigment granules are found inside the retinal cells and in the outer ring of pigmentary cells (Insausti and Lazzari, 2002) (Fig. 5A).

When we studied mutant compound eyes, we observed a lack of screening pigments inside the retinular cells for both species. For *T. infestans*, we found red pigment granules inside the primary and secondary pigment cells. However, the amount of pigment found

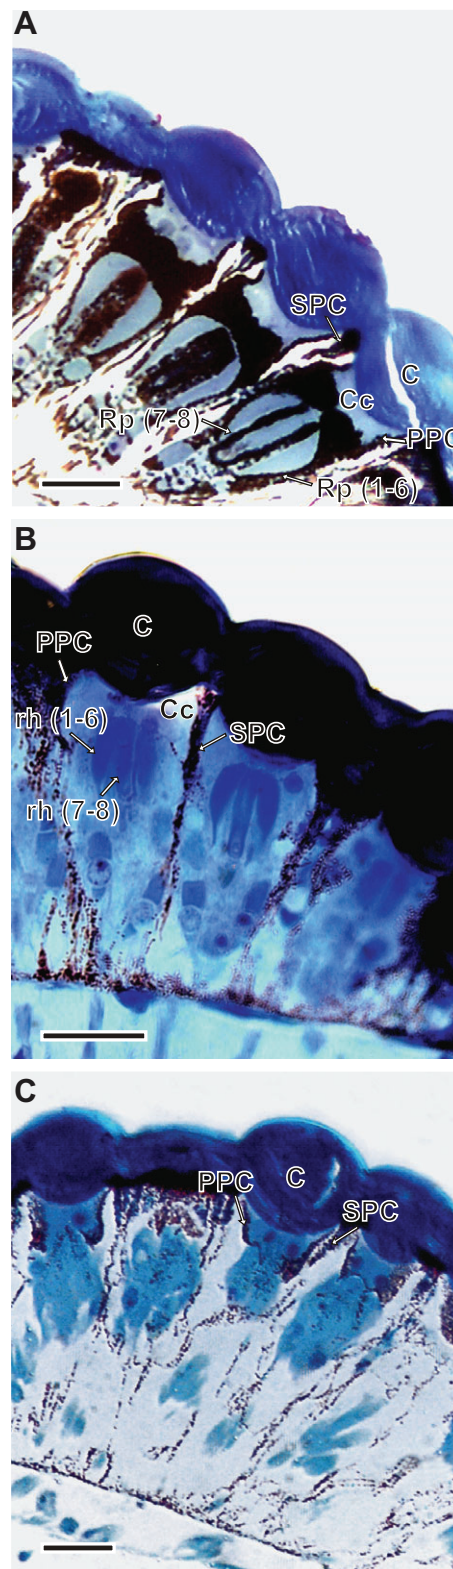

Fig. 3. Light micrographs of longitudinal sections through the compound eyes of the fourth larval stage of *Triatoma infestans*. (A) Wild type. (B) Red-eyed mutant reared in DD conditions, showing the intact structure of the retina. (C) Red-eyed mutant reared in LD conditions. The partial damage of the retinal structure is evident already. C, cornea; Cc, crystalline cone; PPC, primary pigment cell; rh, rhabdomere; Rp, retinal pigment; SPC, secondary pigment cell; 1–8 indicate the retinula cell number. Scale bars:  $30 \mu\text{m}$ .

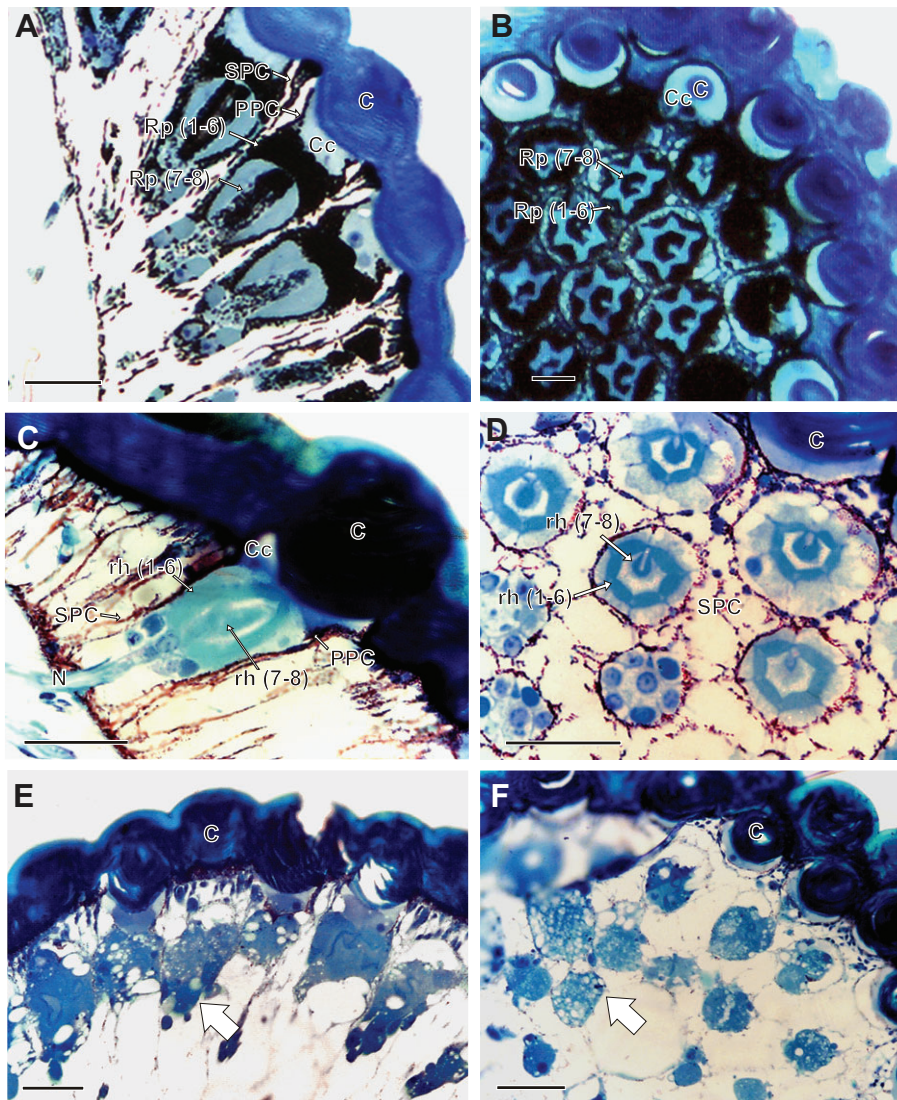

Fig. 4. Light micrographs of sections through the compound eyes of the adult stage of *Triatoma infestans*. (A) Wild type, longitudinal section. (B) Wild type, cross section. (C) Longitudinal section of red-eyed mutant reared in DD conditions showing the intact structure of the retina. (D) Cross-section of red-eye of the same individual shown in C. (E) Longitudinal section of red-eyed mutant reared in LD conditions. (F) The same as E, but in cross-section. Note the significant damage of the retina shown in E and F (arrows). C, cornea; Cc, crystalline cone; PPC, primary pigment cell; rh, rhabdomere; Rp, retinal pigment; SPC, secondary pigment cell; 1–8 indicate the retinula cell number. Scale bars, 30 µm.

in the primary pigment cells was lower than for the wild bugs (Fig. 2B, Fig. 3B, Fig. 4C,D). We found similar results for *R. prolixus* secondary pigment cells but we found no pigment at all in the primary pigment cells for this species (Fig. 7C,D).

The analysis of postembryonic development of the eyes of *T. infestans* mutants kept under LD conditions showed intact retinular cells in first-instar larvae (Fig. 2B). As the individuals grew, progressive cellular damage was observed. Consequently, damage was particularly severe in adults (Fig. 3C, Fig. 4E,F).

For mutants reared in complete darkness, no damage of the cellular structure was observed for larvae or adults (Fig. 3B, Fig. 4C,D).

Examination of the ocelli of red-eyed mutants (Fig. 5B) revealed the absence of pigment granules inside both pigmentary and retinal cells. No cellular damage was observed in the ocellar retina for either treatment (LD or DD).

#### Visual performance

Fig. 6 depicts the sensitivity to light of wild-type and mutant *T. infestans*, as revealed by the intensity of the photonegative response. Four groups were compared: (1) light-adapted wild-type bugs (i.e. dispersed screening pigments); (2) dark-adapted wild-type bugs (i.e. retracted screening pigments); (3) red-eyed mutants reared in DD

(i.e. no screening pigments, intact retina); and (4) red-eyed mutants reared in LD (i.e. no screening pigments, damaged retina). All groups reacted to light at both light intensities tested. The intensity of the response to light varied across groups as follows: mutant bugs reared under constant darkness > dark-adapted normal bugs > mutants reared in LD > light-adapted normal bugs.

#### The effect of blood ingestion

As for *T. infestans*, the red-eye of *R. prolixus* mutants unfed and kept in DD exhibits an ommatidial structure that only differs from wild-type insects by the absence of dark screening pigments (Fig. 7).

For insects that were exposed for 2 weeks to UV light, the influence of blood feeding became evident. While non-fed insects did not exhibit any retinal damage when compared with DD-reared insects, mutants that were blood fed before UV exposure showed clear signs of retinal damage (Fig. 8A,B). Feeding also affected wild-type insects. After 2 weeks of exposure to UV, unfed wild-type insects did not exhibit any noticeable change, but insects that were fed showed an increase in the relative amount of screening pigments (Fig. 8C,D). Finally, after 1 month of exposure to UV, photodamage was evident for the red-eyed bugs, as shown in Fig. 9A. In wild-type insects, however, a marked increase in the amount and density of screening pigments was observed (Fig. 9B).



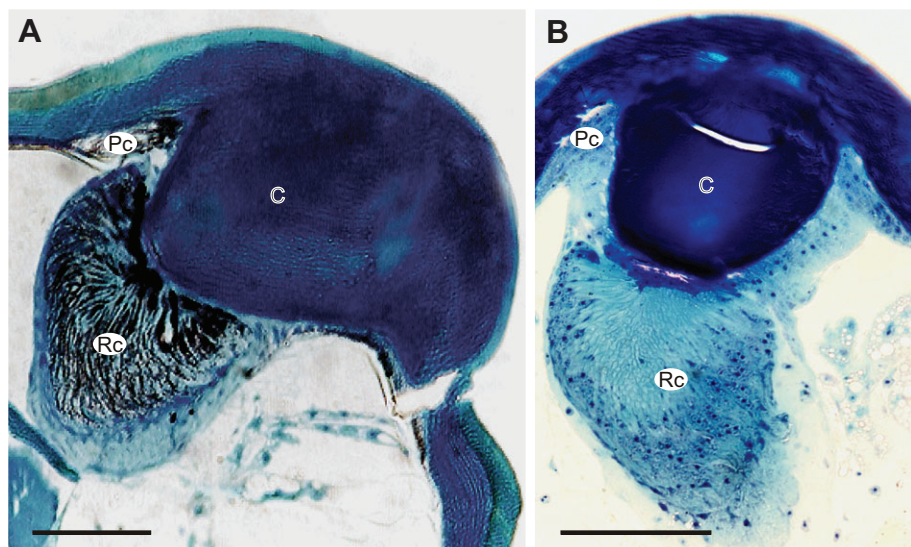

Fig. 5. Light micrographs of sections through the ocellus of *Triatoma infestans* recently emerged to the adult stage, reared in LD conditions. (A) Wild type. (B) Red-eyed mutant. As a new structure, the ocellus shows no damage, as compared with the retina of the compound eye of the same individual (Fig. 4E,F). C, cornea; Pc, pigmentary cells; Rc, retinal cells. Scale bars, 100  $\mu$ m.

## DISCUSSION

### The nature of pigments

The screening pigments present inside the pigment and retinula cells determine the color of insect eyes. These pigments belong to two chemical classes: ommochromes and pteridines (Langer, 1975). Pteridines are found in smaller amounts, and they can be white, yellow and red (Langer, 1975). The nature of the ommochromes present in the secondary pigment cells may vary with insect species. Some insects only have xanthommatin, while in others a mixture of xanthommatin and ommins is present. Xanthommatin can be present in an oxidized form (yellow-brown) or in a reduced form (red) (Langer, 1960; Linzen, 1967). The pigment granules containing ommins were described in the receptor cells and the primary pigment cells (Langer, 1975). The eye-color mutants lack or have low amounts of one or more of these screening pigments (Summers et al., 1982).

Among triatomines, the red eye is the most frequent mutation. In wild-type *R. prolixus*, the presence of both ommins and xanthommatin has been reported (Butenandt et al., 1960; Linzen, 1974). In *T. infestans*, Moraes et al. (Moraes et al., 2005) concluded that xanthommatin is the only ommochrome present in both wild-type and red-eyed insects. These authors excluded the presence of pteridines in the eyes of *T. infestans* and did not report the presence of ommins. They suggested that the red color of mutant eyes was caused by a smaller amount of xanthommatin compared with wild-type eyes. Our morphological analysis revealed that in *R. prolixus* and *T. infestans* the retinular cells of red-eyed mutants completely lacked pigments, and pigment cells contained only red pigment granules. The amount of pigments inside the primary pigment cells of *T. infestans* mutants is lower than for wild-type bugs. We thus concluded that for the eyes of *T. infestans*, as previously reported for *R. prolixus*, two kinds of ommochromes are present. Ommins must be the dark pigment found inside the retinula cell and red xanthommatin the one present in the secondary pigment cells. In wild-type insects, a mixture of both must be present in the primary pigment cell. This way, if red-eyed mutants lack dark ommins, xanthommatin will be the red pigment present in secondary cells and primary pigment cells. Because the ocelli of mutant insects lack screening pigments inside both retinal and pigmentary cells, we can state that the only pigment present in the wild-type ocelli should be ommins. A biochemical analysis is necessary to confirm this hypothesis, but it seems the most parsimonious one according to the available evidence.

### The visual performance of mutants

The present work revealed that mutation does not abolish visual input, but affects the light sensitivity threshold. Mutants reared in DD were more sensitive to light than wild-type bugs, probably because they lack most of the eye screening pigments and have an intact retina (more photons can stimulate the photoreceptors). When reared in LD, light exposure damaged some of the photoreceptors located in the medial regions of the eye (those present along the whole development of bugs). It should be noted that because new ommatidia are added at the eye periphery at each molt (Settembrini, 1984), photodamage is more marked in the old medial ommatidia than in the peripheral ones (not shown). This allows bugs to remain relatively sensitive to light throughout their life despite the degradation of the oldest ommatidia. Provided that the number of functional photoreceptors is reduced upon exposure to light, the sensitivity of LD-reared mutant bugs is nevertheless lower than for the bugs reared in DD.

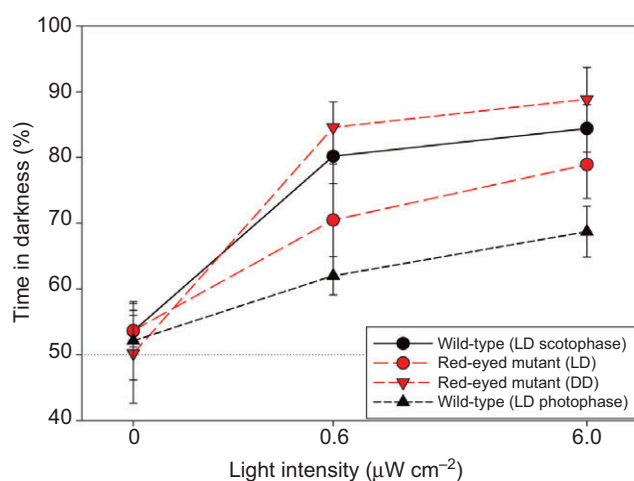

Fig. 6. Phototactic sensitivity of wild-type and red-eyed mutants of *Triatoma infestans*. Because the migration of screening pigments modulates the sensitivity to light of wild-type bugs, they were tested during the scotophase and the photophase. Mutants do not experience adaptation because of the lack of those pigments, but their exposure to light produced retinal photodamage. LD, bugs kept under a light/dark cycle; DD bugs maintained in constant darkness.

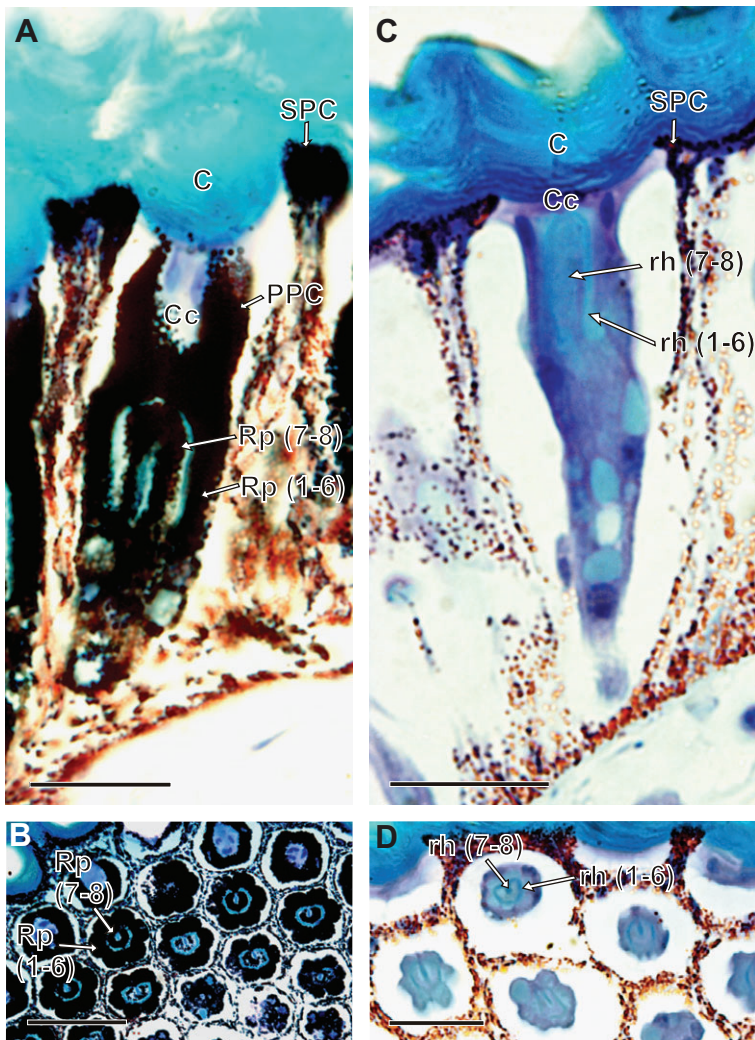

Fig. 7. Light micrographs of sections through the compound eyes of fifth-instar larvae of *Rhodnius prolixus*. (A) Wild type, longitudinal section. (B) Wild type, cross-section. (C) Unfed red-eyed mutant reared in permanent darkness (longitudinal section), showing the intact structure of the retina. (D) The same as C, but in cross-section. C, cornea; Cc, crystalline cone; PPC, primary pigment cell; rh, rhabdomere; Rp, retinal pigment; SPC, secondary pigment cell; 1–8 indicate the retinula cell number. Scale bars: 30  $\mu$ m.

Wild-type bugs also vary in their sensitivity to light as a consequence of the movement of screening pigments (Reisenman et al., 2002). They are less sensitive during the photophase than during the scotophase (Reisenman et al., 1998). When compared with mutants, the strong limitation of photon arrival to the rhabdom exerted by screening pigments in light-adapted normal eyes (i.e. tested during the photophase) make these bugs the less-sensitive group of insects. Dark-adapted bugs (i.e. tested during their scotophase), as expected, were more sensitive than light-adapted ones, but not as sensitive as mutants reared in DD.

It should be noted that the daily adaptation of the compound eye of wild bugs involves two processes, the migration of screening pigments and the axial displacement of the rhabdom (Reisenman et al., 2002). In red-eyed mutants, neither process takes place and, as a consequence, no change in their condition occurs between the scotophase and the photophase. Two conclusions can be drawn from this observation. First, no adaptation occurs in the red eye and, second, the axial migration of the rhabdom is not driven by its own movement, but by the displacement from screening pigments present into the reticular cells.

This is the first time that the effects of a mutation on the visual system of hemimetabolous insects has been tested. So far, most work has been carried out on holometabolous insects and thus research is restricted to the adult stage only. Working with hemimetabolous insects offers the possibility of evaluating long-

term effects across developmental instars. Furthermore, most of these studies are purely descriptive and not manipulative. Despite these differences, however, our results are consistent with the results found for holometabolous insects. The compound eye of worker honeybees with snow and laranja mutations (an alteration of tryptophan metabolism) had an increased sensitivity to light, which was explained by the absence of any screening pigment (Gribakin and Chesnokova, 1982). Similarly, in the blowfly *Calliphora erythrocephala*, an important increase in sensitivity was evinced in mutants lacking screening pigments when compared with normal flies (Streck, 1972). This is logical as in the eye of flies screening pigments optically isolate adjacent ommatidia.

In the case of *Drosophila*, several studies on the effect of mutations on visual performance have been published. Visual performance was measured by means of electroretinogram and phototactic behavior (Broda and Willmund, 1981; Pak, 1995; Belušić, 2011). Given the existing diversity of mutations and the fact that in many cases previous exposure to light was not controlled, it is difficult to discriminate the relative importance of different parameters, such as lack of pigment, retinal damage, aging, etc.

#### The photo-protector role of the screening pigments

The main function assigned to screening pigments in the compound eyes of insects is related to vision, i.e. to screen out stray light and control the incident light flux at the photoreceptors and their angular



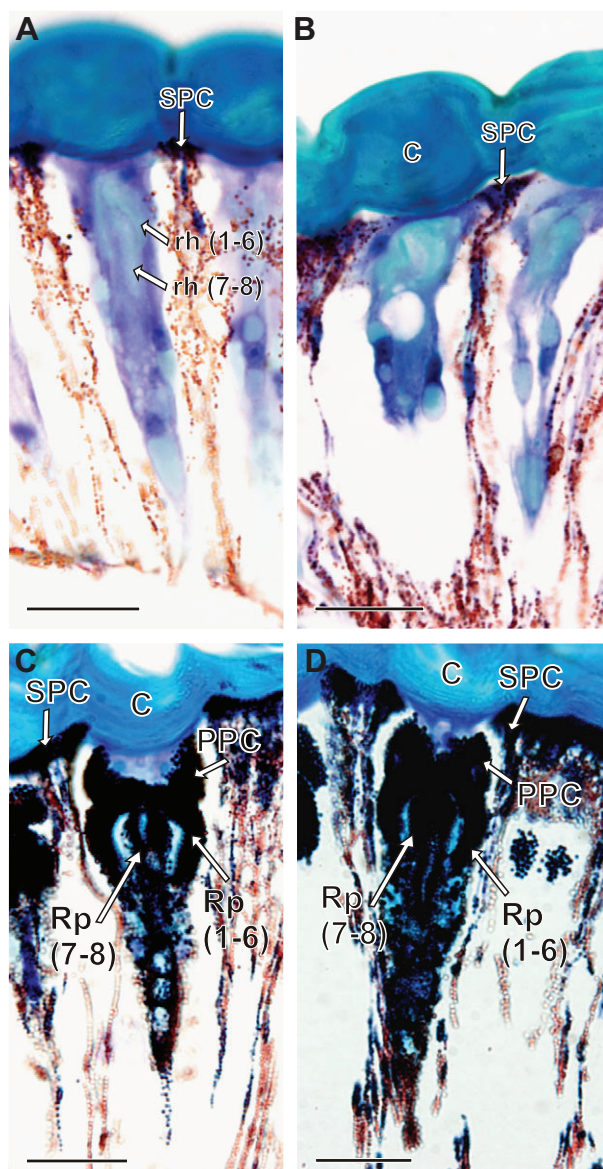

Fig. 8. Light micrographs of sections through the compound eyes of fifth-instar larvae of *Rhodnius prolixus* exposed for 2 weeks to UV light. (A) Unfed red-eyed mutant. (B) Fed red-eyed mutant. (C) Unfed wild-type insect. (D) Fed wild-type insect. The structure of the retina of unfed red-eyed mutants (A) as well as that of unfed (C) and fed (D) wild-type insects is conserved. In contrast, the signs of damage in the retina of the fed red-eyed mutants (B) are evident. C, cornea; Cc, crystalline cone; PPC, primary pigment cell; rh, rhabdomere; Rp, retinal pigment; SPC, secondary pigment cell; 1–8 indicate the retinula cell number. Scale bars, 30  $\mu$ m.

acceptance (Stavenga, 1989). However, *in vitro* studies revealed that melanin in vertebrates and ommochromes in invertebrates fulfills the same function as effective inhibitors of free radicals induced by lipid peroxidation, protecting eye structures against UV- or bright light-induced damage (Ostrovsky et al., 1987; Sakina et al., 1987; Meyer-Rochow et al., 2002). *In vivo* studies of deep-water living crustaceans have shown that the exposure to illumination ranging from moderate to high produced retinal damage, revealing the deleterious effect of light (Nilsson and Lindström, 1983). As underlined by Boulton et al. (Boulton et al., 2001), 'The retina represents a paradox, in that, while light and oxygen are essential for vision, these conditions also favour the formation of reactive

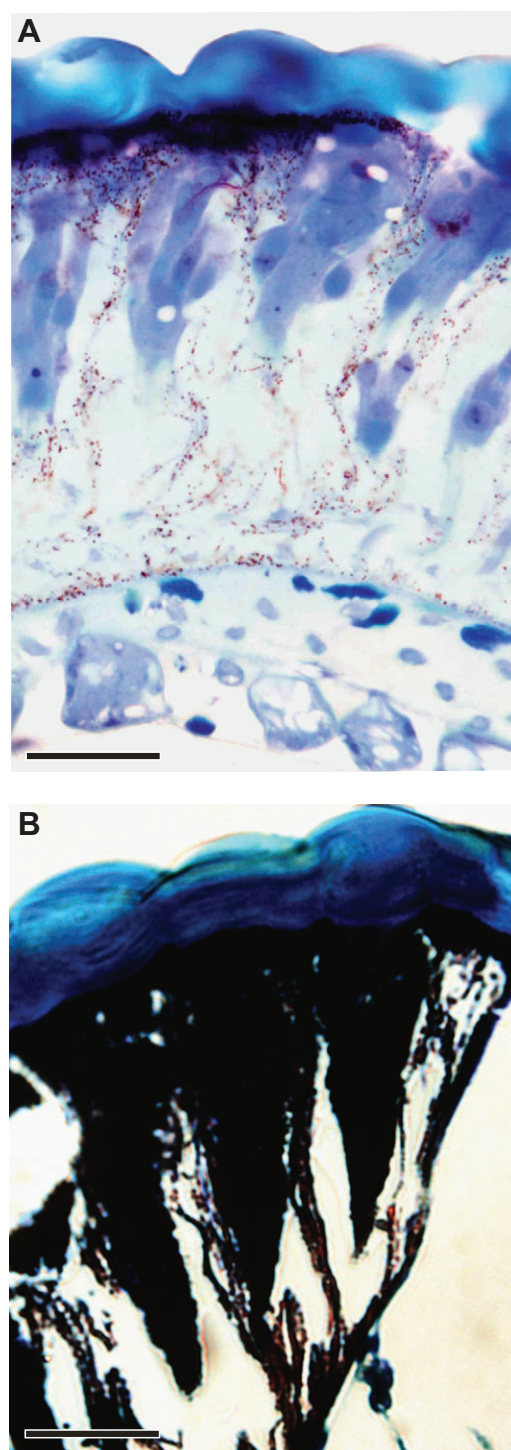

Fig. 9. Light micrographs of sections through the compound eyes of unfed fifth-instar larvae of *Rhodnius prolixus* exposed for 1 month to UV light. (A) Red-eyed mutant showing the damaged retina. (B) Wild-type insect; note the increased density of screening pigment granules. Scale bars, 30  $\mu$ m.

oxygen species leading to photochemical damage to the retina.' Screening pigments protect retinal integrity in two ways, first physically, by reducing the light intensity reaching the photoreceptors, and second chemically as an antioxidant. However, until now this last function has never been investigated for the screening pigments of the compound eyes of insects.

In the present work we demonstrated the protective role of the screening pigments in the eyes of triatomine bugs and most likely insects in general. This assertion is supported by the fact that red-eyed mutant bugs, which lack screening pigments within the retinula cells, presented a highly degraded retina and severe reduction of visual performance when exposed to light. This degradation became more severe as the insects aged, i.e. with the cumulative time of light exposure. Ocelli exhibited no damage, probably because their exposure to light is shorter given their imaginal character.

In addition, the hematophagous condition of triatomine insects makes them particularly interesting. Hematophagous insects ingest large amounts of blood every meal, the digestion of which produces a high concentration of heme. Free heme is a powerful generator of reactive oxygen species, which damage biological systems through oxidation of lipids, proteins and DNA (Vincent, 1989). Thus, the eyes of hematophagous insects are exposed to two types of oxidative stress: the light they receive and the blood that the insect ingests. Screening pigments seem to be able to reduce this stress by means of two mechanisms, first by reducing the amount of light reaching the retinular cells and, second by acting as antioxidant agents. In the present work we demonstrated that screening pigments play a fundamental role in visual cells protection against oxidative processes caused by blood feeding and photo-oxidative stress. This was not only evident in mutants lacking these pigments, but also in wild-type bugs as highlighted by the increase in screening pigment quantity observed in the ommatidia of insects exposed to stress factors (Fig. 8C, Fig. 9B). This increase occurred within a single instar, revealing that ommochrome synthesis is independent of molting and is directly induced by stress in order to maintain the retinular integrity.

In conclusion, the eyes of blood-sucking insects are particularly exposed to a double oxidative stress, which is reduced by the presence and active synthesis of screening pigments. In the case of triatomines, which are able to obtain blood meals reaching more than 10 times their own body weight at each feeding event, we can speculate that their strong photophobic behavior helps to reduce the oxidative stress to which they are submitted.

## ACKNOWLEDGEMENTS

We are indebted to the staff members of our research group at the IRBI for fruitful discussions, to C. Labrousse for technical support with insect rearing, and to an anonymous reviewer for valuable comments.

## AUTHOR CONTRIBUTIONS

T.C.I. and C.R.L. conceived and designed the study. All three authors participated in the execution of the experiments and the morphological analysis, as well as in drafting and revising the article.

## COMPETING INTERESTS

No competing interests declared.

## FUNDING

This work received support from the Centre National de la Recherche Scientifique (CNRS), the University of Tours and the Agence Nationale de la Recherche (ANR-08-MIE-007, EcoEpi), France.

## REFERENCES

- Belušić, G. (2011). ERG in *Drosophila*. In *Electroretinograms* (ed. G. Belušić), pp. 221-238. InTech, available at <http://www.intechopen.com/books/electroretinograms/erg-in-drosophila>.
- Boulton, M., Rózanowska, M. and Rózanowski, B. (2001). Retinal photodamage. *J. Photochem. Photobiol. B* **64**, 144-161.
- Broda, H. and Willmund, R. (1981). Fast phototaxis and electroretinograms in red-eyed and white-eyed retinal degeneration mutants of *Drosophila melanogaster*. *J. Insect Physiol.* **27**, 789-792.
- Butenandt, A., Biekert, E., Kübler, H. and Linzen, B. (1960). Über Ommochrome, XX. Zur Verbreitung der Ommatine im Tierreich. Neue Methoden zu ihrer Identifizierung und quantitativen Bestimmung. *Hoppe-Seyler's Z. Physiol. Chem.* **319**, 238-256.
- Caiaffa, C. D., Stiebler, R., Oliveira, M. F., Lara, F. A., Paiva-Silva, G. O. and Oliveira, P. L. (2010). Sn-protoporphyrin inhibits both heme degradation and hemozoin formation in *Rhodnius prolixus* midgut. *Insect Biochem. Mol. Biol.* **40**, 855-860.
- Dontsov, A. E., Lapina, V. A. and Ostrovsky, M. A. (1984). Photoregeneration of O<sub>2</sub><sup>-</sup> by ommochromes and their role in the system of antioxidative protection of invertebrate eye cells. *Biofizika* **29**, 878-882.
- Dontsov, A. E., Fedorovich, I. B., Lindström, M. and Ostrovsky, M. A. (1999). Comparative study of spectral and antioxidant properties of pigments from the eyes of two *Mysis relicta* (Crustacea, Mysidacea) populations, with the different light damage resistance. *J. Comp. Physiol. B* **169**, 157-164.
- Graça-Souza, A. V., Maya-Monteiro, C., Paiva-Silva, G. O., Braz, G. R. C., Paes, M. C., Sorgine, M. H. F., Oliveira, M. F. and Oliveira, P. L. (2006). Adaptations against heme toxicity in blood-feeding arthropods. *Insect Biochem. Mol. Biol.* **36**, 322-335.
- Gribakin, F. G. and Chesnokova, E. G. (1982). Changes in functional characteristics of the compound eye of bees caused by mutations disturbing tryptophan metabolism. *Neurophysiology* **14**, 57-62.
- Hotta, Y. and Benzer, S. (1969). Abnormal electroretinograms in visual mutants of *Drosophila*. *Nature* **222**, 354-356.
- Insausti, T. C. and Lazzari, C. R. (2002). The fine structure of the ocelli of *Triatoma infestans* (Hemiptera: Reduviidae). *Tissue Cell* **34**, 437-449.
- Langer, H. (1960). Über den chemischen Aufbau des Facettenauges von *Calliphora erythrocephala* Meig. und seine Veränderungen mit dem Imaginalalter. *Z. Vgl. Physiol.* **42**, 595-626.
- Langer, H. (1975). Properties and functions of screening pigments in insects eyes. In *Photoreceptor Optics* (ed. A. W. Snyder and R. Menzel), pp. 429-455. New York, NY: Springer-Verlag.
- Lazzari, C. R., Reisenman, C. E. and Insausti, T. C. (1998). The role of the ocelli in the phototactic behaviour of the haematophagous bug *Triatoma infestans*. *J. Insect Physiol.* **44**, 1159-1162.
- Lazzari, C. R., Fischbein, D. and Insausti, T. C. (2011). Differential control of light-dark adaptation in the ocelli and compound eyes of *Triatoma infestans*. *J. Insect Physiol.* **57**, 1545-1552.
- Linzen, B. (1967). Zur Biochemie der Ommochrome. Unterteilung, Vorkommen, Biosynthese und physiologische Zusammenhänge. *Naturwissenschaften* **54**, 259-267.
- Linzen, B. (1974). The tryptophan → ommochrome pathway in insects. In *Advances in Insect Physiology*, Vol. 10 (ed. J. E. Treherne, M. J. Berridge and V. B. Wigglesworth), pp. 117-246. New York, NY: Academic Press.
- Meyer-Rochow, V. B. (1994). Light-induced damage to photoreceptors of spiny lobsters and other crustaceans. *Crustaceana* **67**, 95-109.
- Meyer-Rochow, V. B., Kashiwagi, T. and Eguchi, E. (2002). Selective photoreceptor damage in four species of insects induced by experimental exposures to UV irradiation. *Micron* **33**, 23-31.
- Moraes, A. S., Pimentel, E. R., Rodrigues, V. L. C. C. and Mello, M. L. S. (2005). Eye pigments of the blood-sucking insect, *Triatoma infestans* Klug (Hemiptera, Reduviidae). *Braz. J. Biol.* **65**, 477-481.
- Müller, J. (1970). Feinbau und Dunkeladaptation der Komplexaugen von *Rhodnius prolixus* (Stal). *Zool. Jahrb. Physiol.* **75**, 111-133.
- Nilsson, H. L. and Lindström, M. (1983). Retinal damage and sensitivity loss of a light-sensitive crustacean compound eye (*Cirrolana borealis*): electron microscopy and electrophysiology. *J. Exp. Biol.* **107**, 277-292.
- Núñez, J. A. and Lazzari, C. R. (1990). Rearing of *Triatoma infestans* Klug (Het, Reduviidae) in the absence of a live host. I. Some factors affecting the artificial feeding. *J. Appl. Entomol.* **109**, 87-92.
- Ostrovsky, M. A., Sakina, N. L. and Dontsov, A. E. (1987). An antioxidative role of ocular screening pigments. *Vision Res.* **27**, 893-899.
- Pak, W. L. (1995). *Drosophila* in vision research. The Friedenwald Lecture. *Invest. Ophthalmol. Vis. Sci.* **36**, 2340-2357.
- Pires, H. H., Abreu, D. O., Machado, E. M., Schofield, C. J. and Diotaiuti, L. (2002). Eye colour as a genetic marker for fertility and fecundity of *Triatoma infestans* (Klug, 1834) Hemiptera, Reduviidae, Triatominae. *Mem. Inst. Oswaldo Cruz* **97**, 675-678.
- Reisenman, C. E., Lazzari, C. R. and Giurfa, M. (1998). Circadian control of photonegative sensitivity in the haematophagous bug *Triatoma infestans*. *J. Comp. Physiol. A* **183**, 533-541.
- Reisenman, C. E., Insausti, T. C. and Lazzari, C. R. (2002). Light-induced and circadian changes in the compound eye of the haematophagous bug *Triatoma infestans* (Hemiptera: Reduviidae). *J. Exp. Biol.* **205**, 201-210.
- Sakina, N. L., Dontsov, A. E., Lapina, V. A. and Ostrovsky, M. A. (1987). Protective system of eye structures from photoinjury. II. Screening pigments of arthropods (ommochromes) as inhibitors of photooxidative processes. *J. Evol. Biochem. Physiol.* **23**, 702-706.
- Settembrini, B. P. (1984). The compound eyes of *Triatoma infestans* and *Rhodnius prolixus* (Hemiptera: Reduviidae). *J. Med. Entomol.* **21**, 477-479.
- Stavenga, D. G. (1989). Pigments in compounds eyes. In *Facets of Vision* (ed. D. G. Stavenga and R. C. Hardie), pp. 152-172. Berlin: Springer Verlag.
- Stiebler, R., Timm, B. L., Oliveira, P. L., Hearne, G. R., Egan, T. J. and Oliveira, M. F. (2010). On the physico-chemical and physiological requirements of hemozoin formation promoted by perimicrovillar membranes in *Rhodnius prolixus* midgut. *Insect Biochem. Mol. Biol.* **40**, 284-292.
- Streck, P. (1972). Der Einfluss des Schirmpigmentes auf das Sehfeld einzelner Sehzellen der Fliege *Calliphora erythrocephala* Meig. *Z. Verg. Physiol.* **76**, 372-402.
- Summers, K. M., Howells, A. J. and Pylott, N. A. (1982). Biology of eye pigmentation in insects. *Adv. Insect Phys.* **16**, 119-166.
- Vincent, S. H. (1989). Oxidative effects of heme and porphyrins on proteins and lipids. *Semin. Hematol.* **26**, 105-113.
